# Supplementary material for: The growth mode of ZnO on HZSM-5 substrates by atomic layer deposition and its catalytic property in the synthesis of aromatics from methanol
Source: Royal Society of Chemistry journal article supplement (doi:10.1039/c5cy01651g), 2015-11-26
Supplement: c5cy01651g1.pdf [file c5cy01651g1.pdf]

## The Growth Mode of ZnO on Porous HZSM-5 Substrates by Atomic Layer Deposition and Its Catalytic Property in the Synthesis of Aromatics from Methanol

Fei Wang<sup>a</sup>, Weiyin Xiao<sup>a</sup>, Lijing Gao<sup>a</sup>, Guomin Xiao<sup>a\*</sup>

### SUPPLEMENTARY DATA

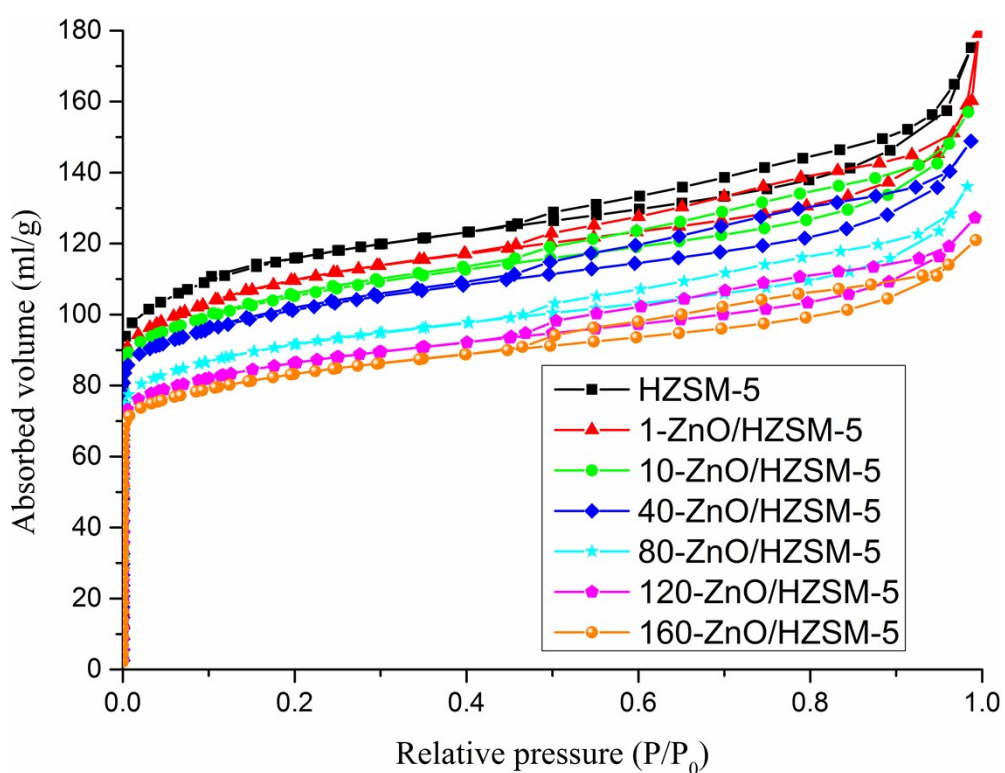

Fig. S1 The N<sub>2</sub> adsorption-desorption isotherms of ZnO modified HZSM-5 catalysts compared with the blank HZSM-5

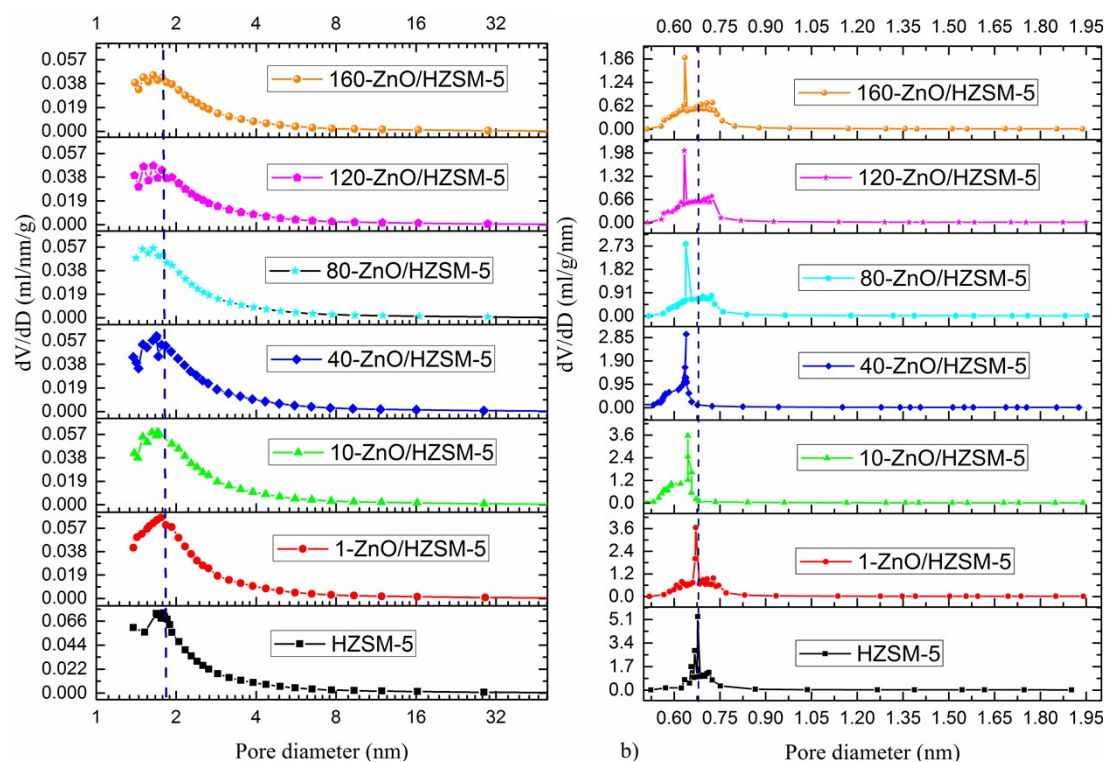

Fig. S2 The pore size distribution of blank HZSM-5 and ZnO ALD modified samples: a) mesopore size distribution which is determined by the BJH analysis of adsorption isotherm data; b) micropore size distribution which is evaluated by the HK method

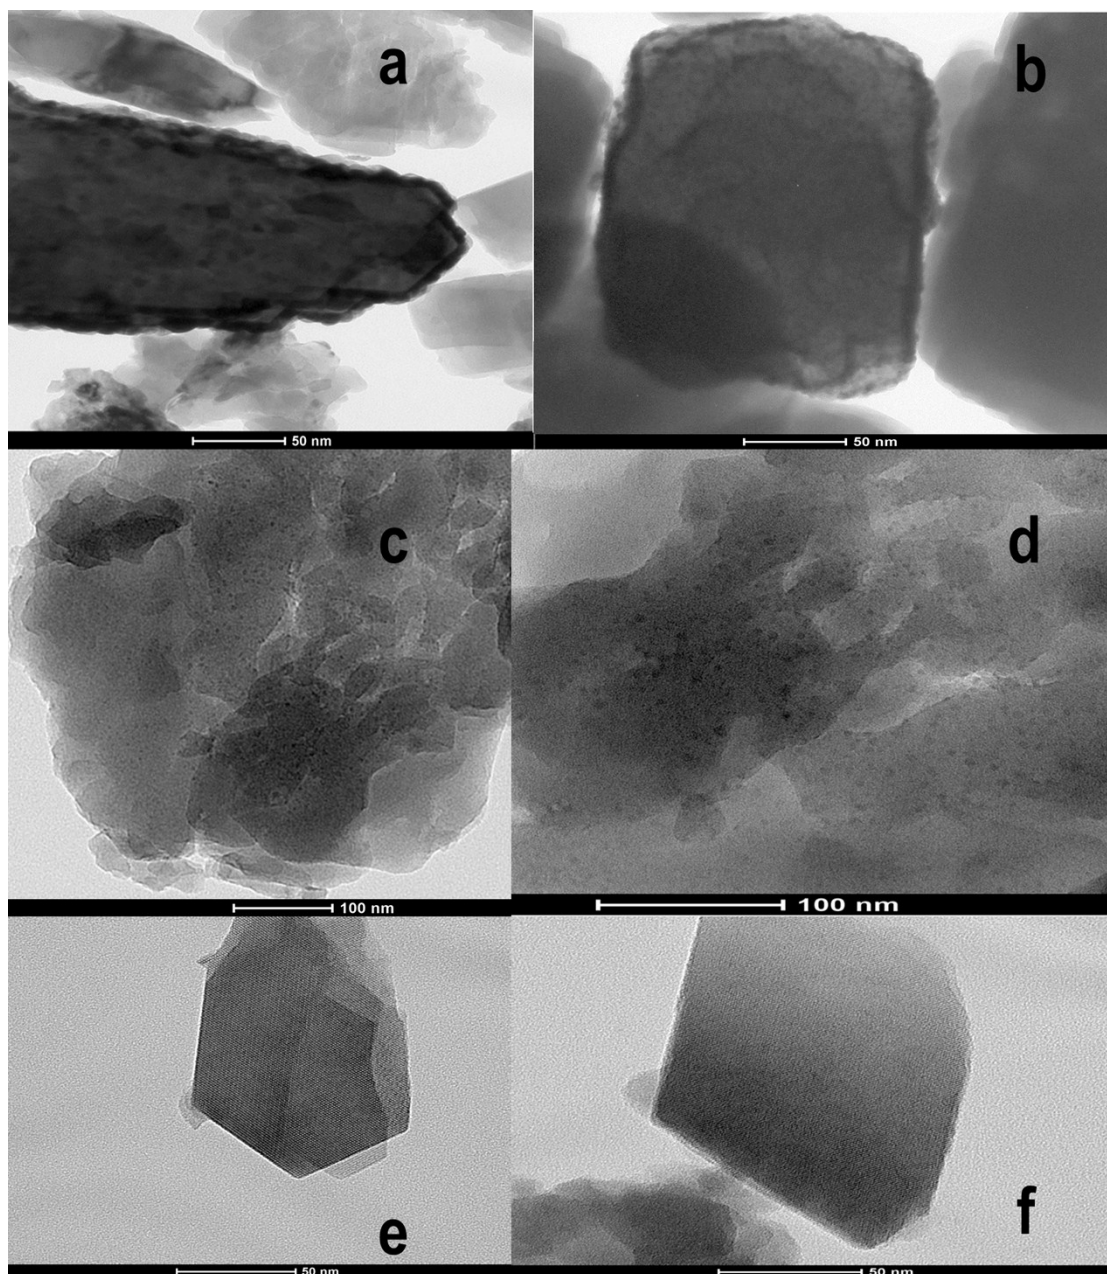

Fig. S3 a) fresh 40-ZnO/HZSM-5 (ALD); b) 40-ZnO/HZSM-5 (ALD) after three reaction-regeneration cycles; c) fresh ZnO/HZSM-5 (IWI); d) ZnO/HZSM-5 (IWI) after three reaction-regeneration cycles; e) fresh Zn/HZSM-5 (IE); f) Zn/HZSM-5 (IE) after three reaction-regeneration cycles

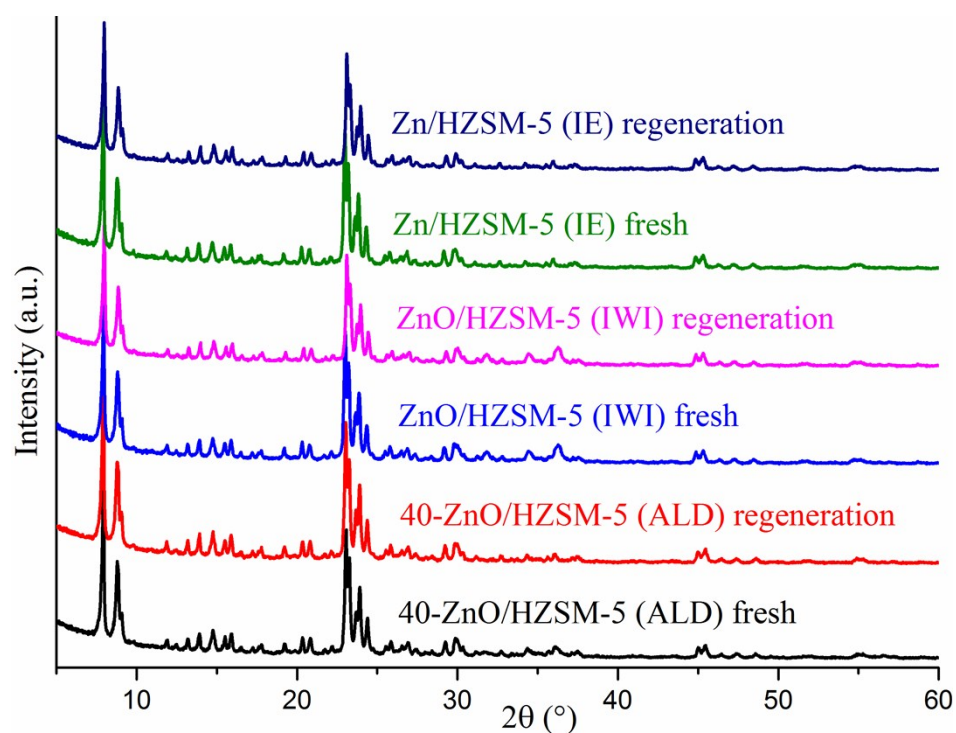

Fig. S4 XRD patterns of fresh and regenerated ZnO/HZSM-5 catalysts

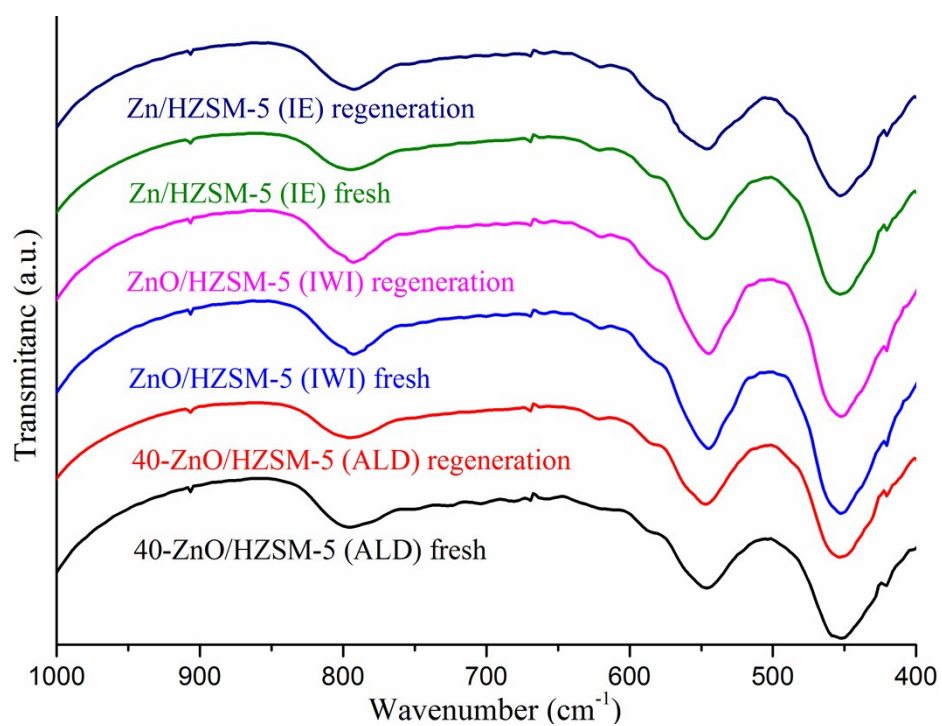

Fig. S5 FT-IR spectra of fresh and regenerated ZnO/HZSM-5 catalysts

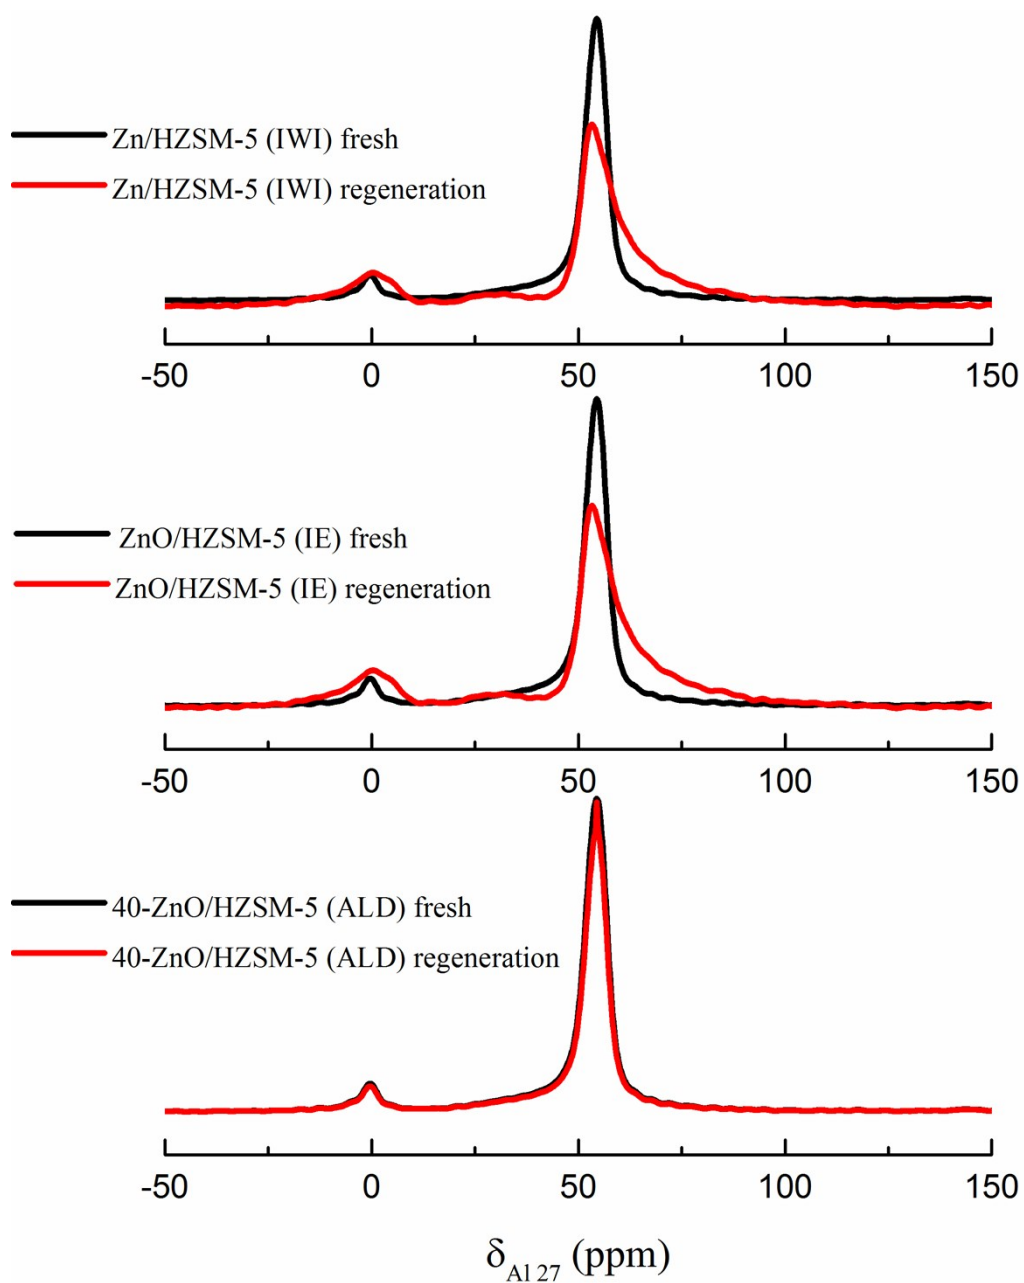

Fig. S6  $^{27}\text{Al}$  NMR spectra of fresh and regenerated ZnO/HZSM-5 catalysts

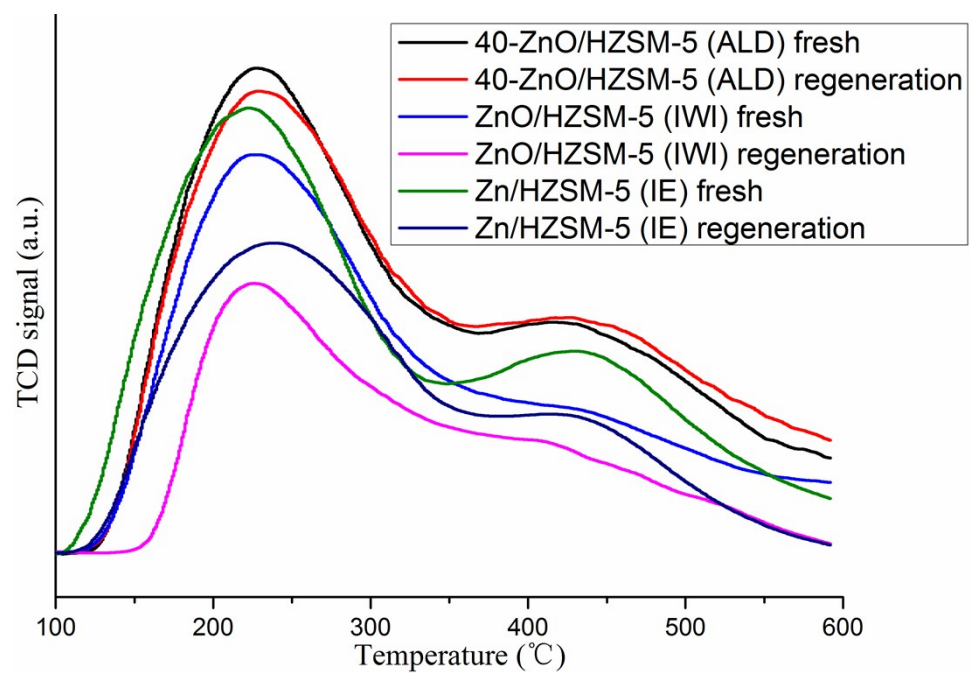

Fig. S7 NH<sub>3</sub>-TPD spectra of fresh and regenerated ZnO/HZSM-5 catalysts
